# 1 Genetically controlled membrane synthesis in liposomes

2  
3 Duco Blanken,<sup>1</sup> David Foschepoth,<sup>1</sup> Adriana Calaça Serrão, Christophe Danelon\*

4  
5 Department of Bionanoscience, Kavli Institute of Nanoscience, Delft University of Technology, van  
6 der Maasweg 9, 2629 HZ, Delft, The Netherlands

7  
8 <sup>1</sup> Equal contribution

9  
10 \*Corresponding author: E-mail: [c.j.a.danelon@tudelft.nl](mailto:c.j.a.danelon@tudelft.nl)

11 Tel.: +31-152788085, Fax: +31-152781202

## 12 13 14 **ABSTRACT**

15 Lipid membrane, nucleic acids, proteins, and metabolism are essential ingredients for life. Synthetic  
16 cellular systems emulating the fundamental properties of living cells must therefore be built upon  
17 these functional elements. In this work, phospholipid-producing enzymes encoded in a synthetic  
18 minigenome are cell-free expressed within liposome compartments. The de novo synthesized  
19 metabolic pathway converts precursors into a variety of lipids, including the constituents of the  
20 parental liposome. Balanced production of phosphatidylethanolamine and phosphatidylglycerol is  
21 realized, owing to transcriptional regulation of specific genes activity combined with a metabolic  
22 feedback mechanism. Fluorescence-based methods are developed to image the synthesis and  
23 membrane incorporation of phosphatidylserine at the single liposome level. Our results provide  
24 experimental evidence for DNA-programmed membrane synthesis in a minimal cell model. Strategies  
25 are discussed to alleviate current limitations toward more effective liposome growth and self-  
26 reproduction.

## 1 INTRODUCTION

2 Life manifests itself as individual cellular entities. Biological cells are spatially delimited from their  
3 surrounding by a lipid membrane. While archaeal membranes are composed of ether lipids, other  
4 cell types use phospholipids as the most abundant membrane constituents. Most phospholipids self-  
5 assemble in aqueous solutions to form vesicles, so called liposomes, under a wide range of  
6 experimental conditions. Spatial organization of biochemical processes within liposomes mimics the  
7 fundamental characteristics according to which natural cells are organized. Therefore, phospholipid  
8 vesicles provide a chassis for the construction of synthetic minimal cells representing comparatively  
9 simple model systems [1-3].

10 Also pertinent to a working definition of cellular life is the notion of self-maintenance, in line  
11 with the view of a basic cell as an autopoietic unit [4], whereby all the system's components are  
12 produced within the boundary. Substrates present in the external environment adsorb to the  
13 membrane or diffuse across, and are transformed into molecular building blocks by metabolic  
14 processes. Another aspect that is particularly relevant when describing the inner functioning of a  
15 biological cell is the coupling between the different subsystems [5], such as genetic information,  
16 protein synthesis, and metabolic synthesis of the membrane constituents. Herein, we apply this  
17 conceptual framework to the construction of a minimal cell that can produce its own membrane  
18 components. Cell-free protein and phospholipid synthesis, directed by a DNA program, is carried out  
19 inside a liposome, constituting a first integrative step on the way to the development of an  
20 autonomously growing and dividing artificial cell.

21 Various strategies have been described to grow liposomes. Membrane constituents directly  
22 supplied in the external medium in the form of monomers, micelles or small unilamellar vesicles can  
23 spontaneously adsorb or fuse to the liposome membrane increasing its surface area [6-9]. Moreover,  
24 non-enzymatic mechanisms to produce membrane lipids from synthetic reactive precursors and  
25 catalysts are particularly effective, leading to substantial vesicle growth [10-13]. In addition, liposome  
26 growth induced by encapsulated nucleic acids [10,14] or catalysts [15] has been reported,  
27 establishing a link between the lipid compartment and its internal content. Such model systems are  
28 attractive for their molecular simplicity and may resemble primitive cells before the emergence of  
29 modern biology. Closer to processes occurring in contemporary cells, enzyme-catalysed biosynthesis  
30 of phospholipids has been realised using purified proteins [16-19]. Further, the lipid-producing  
31 enzymes were encoded in DNA and expressed by in vitro protein synthesis inside liposomes,  
32 providing a genotype-to-phenotype linkage [20,21]. The *Escherichia coli* enzymes glycerol-3-  
33 phosphate (G3P) acyl transferase and lysophosphatidic acid (LPA) acyl transferase, respectively  
34 referred below as PlsB and PlsC from their gene names, were in situ expressed from two DNA  
35 templates [21]. The precursors G3P and fatty acyl coenzyme A (acyl-CoA) were sequentially

1 converted into lysophosphatidic acid and phosphatidic acid (PA) lipids in a two-step enzymatic  
2 reaction (**Fig. 1a**). However, the output phospholipid PA was not part of the original membrane  
3 composition. Regenerating the main constituents of the liposome membrane was complicated by the  
4 multiple headgroup-modifying enzymes that need to be functionally expressed from their genes  
5 within vesicles [21]. This would imply the reconstitution of five additional enzymes, together forming  
6 the entire Kennedy metabolic pathway to enable production of phosphatidylethanolamine (PE) and  
7 phosphatidylglycerol (PG), the most abundant lipids in the *E. coli* membranes.

8 In the present work, we show that the synthesis of PE and PG lipids from simpler precursors  
9 can be genetically controlled inside PE- and PG-containing liposomes. Our results provide  
10 experimental evidence for DNA-encoded homeostatic growth of a liposome-based artificial cell.  
11 Because the metabolic pathway encompasses seven different enzymes, we first assemble all seven  
12 genes on a single plasmid. The PURE (Protein synthesis Using Recombinant Elements) system [22],  
13 here PURE*flex*2.0, is used as a minimal cell-free protein synthesis platform that converts the DNA  
14 program into the whole enzymatic pathway. Phospholipid biosynthesis within liposomes is  
15 demonstrated by quantitative liquid chromatography-mass spectrometry (LC-MS). Relative PE and PG  
16 content is tailored through transcriptional and metabolic regulation mechanisms. Moreover, we  
17 develop fluorescence-based probes to directly visualize membrane incorporation of synthesized  
18 phospholipids at the single vesicle level.

19

20

## 21 **RESULTS**

### 22 **Design and construction of a minigenome for phospholipid biosynthesis**

23 We aimed to reconstitute the Kennedy phospholipid synthesis pathway from *E. coli* starting from all  
24 seven enzyme-encoded genes (**Fig. 1a**). The membrane-bound protein PlsB uses acyl-CoA (or acyl  
25 carrier protein, ACP) as a donor to acylate the 1-position of G3P to form LPA [23]. The 2-position is  
26 subsequently acylated by the membrane protein PlsC to form diacyl PA, again using acyl-CoA as fatty  
27 acid donor, preferring unsaturated carbon chains [23]. Enzymes downstream the pathway are  
28 involved in phospholipid headgroup modifications. The integral membrane protein CdsA catalyses  
29 the activation of PA with cytosine triphosphate (CTP) to generate diacyl-*sn*-glycero-3-(cytidine  
30 diphosphate) (diacyl-CDP-DAG) [24] which serves as a precursor for two separate branches of the  
31 Kennedy pathway. One branch, which leads to the formation of PG as the final product, comprises  
32 the synthesis of phosphatidylglycerol phosphate (PGP) from G3P and CDP-DAG by the membrane-  
33 associated protein CDP-diacylglycerol-glycerol-3-phosphate 3-phosphatidyltransferase (PgsA) [25],  
34 followed by a dephosphorylation step that is catalysed by the phosphatidylglycerophosphatase A, B  
35 [26] or C (PgpA, B or C) [27]. The other branch generates PE as the end-product in a two-step

1 reaction. First, phosphatidylserine (PS) production from CDP-DAG and L-serine is catalysed by the  
 2 CDP-diacylglycerol-serine O-phosphatidyltransferase (PssA). Then, PS is decarboxylated to form PE, a  
 3 reaction that is catalysed by the phosphatidylserine decarboxylase (Psd), a two-subunit protein  
 4 resulting from the autocatalytic serinolysis of a single proenzyme [28].

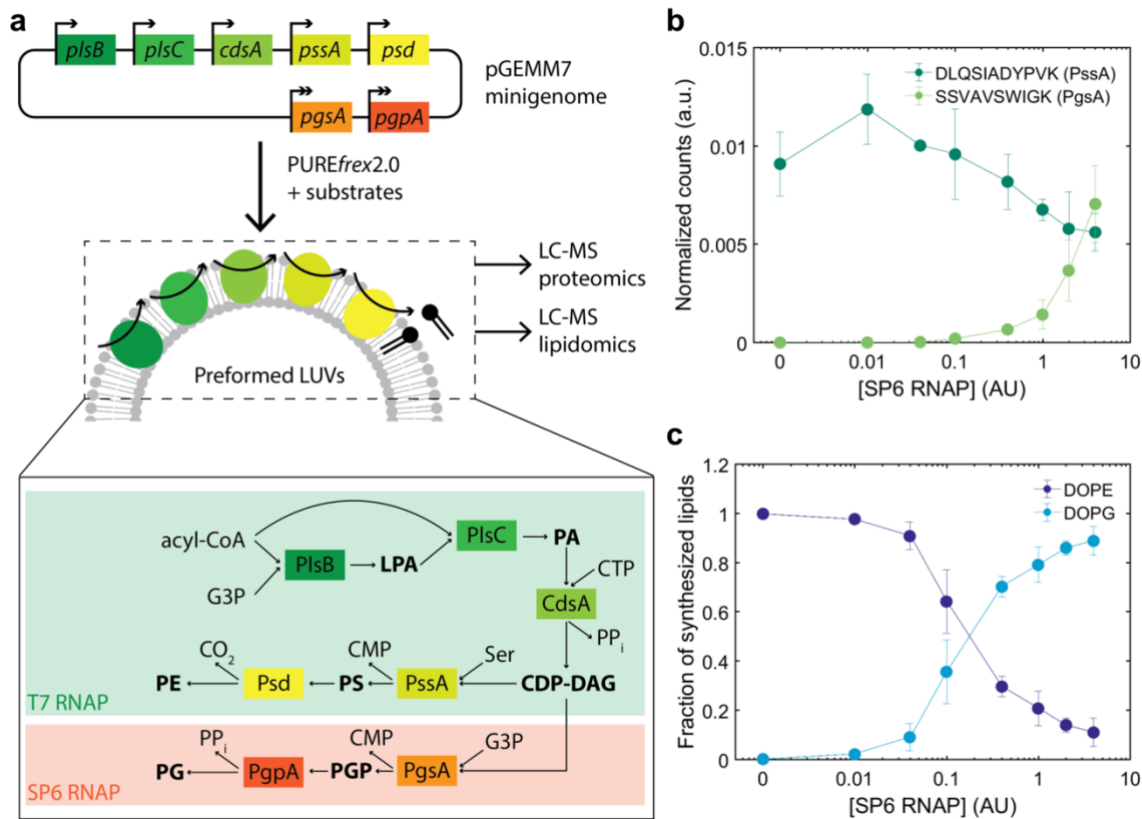

5  
 6 **Figure 1: Genetically controlled production of PE and PG by de novo synthesized enzymes.** **a**, The pGEMM7  
 7 plasmid contains seven genes encoding *E. coli* lipid synthesis enzymes. Transcriptional regulation over the  
 8 production of PE and PG lipids is provided by controlling the expression of specific enzymes with the  
 9 orthogonal T7 (single arrow) and SP6 (double arrow) promoters. The main reaction products are in bold and  
 10 the enzyme names are squared. The PgsA-PgpA branch of the pathway, which leads to PG synthesis, is  
 11 activated upon addition of the SP6 RNAP. An acyl-CoA, the heavy isotope of G3P, CTP and serine (Ser) are the  
 12 input substrates. Expression of pGEMM7 with PURE $\text{frex}2.0$  occurred in the presence of preformed LUVs.  
 13 Protein and lipid production was monitored by LC-MS. PPI, pyrophosphate. **b**, LC-MS analysis of cell-free  
 14 synthesized proteins. Normalised integrated peak intensity for representative peptides of PssA and PgsA, the  
 15 first enzymes after the pathway branches out, for a range of SP6 RNAP concentrations (given in activity units as  
 16 defined by the supplier, AU). Data are the mean  $\pm$  SD of three independent experiments. **c**, LC-MS analysis of de  
 17 novo synthesized phospholipids. The fraction of synthesized DOPE and DOPG is plotted for a range of SP6 RNAP  
 18 concentrations (in AU). Data are the mean  $\pm$  SD of three independent experiments. Source Data are available  
 19 for panels b and c.

1 All seven genes, namely *plsB*, *plsC*, *cdsA*, *pgsA*, *pgpA*, *pssA* and *psd* were concatenated into a  
2 single plasmid DNA as individual transcriptional cassettes, i.e. every gene is under control of its own  
3 promoter, ribosome binding site and transcription terminator (**Fig. 1a**). This design strategy ensures  
4 that all genes will be present at the same copy number upon plasmid encapsulation in liposomes,  
5 thus obviating the functional heterogeneity inherent to uneven partitioning of the separate DNA  
6 templates. Thirty base pair linker sequences were added to each gene and to a linearized pUC19  
7 plasmid backbone by polymerase chain reaction (PCR) to enable a one-step Gibson-assembly of the  
8 final plasmid [29] (**Supplementary Fig. 1 and 2**). The successful assembly of the pGEMM7  
9 minigenome was confirmed using Sanger sequencing and restriction digestion (**Supplementary Fig.**  
10 **3**). The three genes of the common pathway *plsB*, *plsC* and *cdsA*, as well as the two genes *pssA* and  
11 *psd* of the PE synthesis branch are under control of a T7 promoter and are constitutively expressed in  
12 PURE<sub>flex</sub>2.0. The two genes *pgsA* and *pgpA* encoding the enzymes for PG biosynthesis are under  
13 control of an SP6 promoter and are encoded on the opposite strand to prevent read-through  
14 transcription by incomplete termination at the T7 terminator sites (**Supplementary Note 1,**  
15 **Supplementary Fig. 4**). Orthogonality of the two promoter-RNA polymerase (RNAP) pairs was  
16 demonstrated using a fluorescent protein reporter (**Supplementary Fig. 5**).

17

### 18 **Transcriptional regulation of PE and PG biosynthesis**

19 Traditionally, cell-free translation products are characterized by one-dimensional sodium dodecyl  
20 sulfate-polyacrylamide gel electrophoresis (SDS-PAGE) using isotopically or fluorescently labelled  
21 amino acids as a readout. While these methods are suitable to analyse single or a few gene  
22 expression products, they suffer from a poor resolution when multiple proteins are co-synthesized  
23 (**Supplementary Fig. 6**). Here, we applied a targeted LC-MS proteomics approach to detect the de  
24 novo synthesized enzymes and validate transcriptional activation of the PgsA-PgpA pathway by the  
25 SP6 RNAP.

26 Large unilamellar vesicles (LUVs) supplied in PURE<sub>flex</sub>2.0 reactions served as a scaffold for the  
27 expressed membrane-associated and integral membrane proteins. Several proteolytic peptides of  
28 the expressed proteins were identified (**Supplementary Table 4, Supplementary Fig. 7**) and the total  
29 ion current of their observed fragment ions was normalized to a peptide originated from elongation  
30 factor thermo unstable (EF-Tu), an abundant protein in PURE system. In-solution digestion of pre-ran  
31 PURE system reaction samples with trypsin failed to deliver detectable peptides for one of the seven  
32 proteins, namely PgpA (**Supplementary Note 2, Supplementary Fig. 8**). No detectable amounts of  
33 PgsA was measured when the SP6 RNAP was omitted, indicating that unintended expression of the  
34 *pgsA* gene is negligible (**Fig. 1b**). Varying the concentration of SP6 RNAP between 0.01 U  $\mu\text{L}^{-1}$  and 4 U  
35  $\mu\text{L}^{-1}$  is accompanied by a gradual increase in PgsA. Concurrently, the concentration of the PssA

1 enzyme under T7 promoter control decreases upon increased SP6 RNAP concentration. These results  
2 show the power of targeted proteomics for relative quantification of cell-free protein synthesis.  
3 Moreover, they validate our design for tunable expression levels of different enzymes belonging to  
4 orthogonal transcriptional pathways.

5 Successful production of PE and PG lipids and its genetic modulation were confirmed by an LC-  
6 MS lipidomics analysis (**Fig. 1c, Supplementary Fig. 9**). To distinguish the newly produced lipids from  
7 those initially present in the liposome membrane, <sup>13</sup>C-labelled G3P was used as an isotopically heavy  
8 precursor. Oleoyl-CoA was used as the acyl donor. Absolute quantification was achieved by  
9 measuring DOPG and DOPE standards prior and posterior to data acquisition of PURE system  
10 samples. In agreement with proteomics data, synthesized DOPG was detected exclusively in the  
11 presence of SP6 RNAP (**Fig. 1c**). The only intermediate species that significantly accumulates is DOPA  
12 (**Supplementary Fig. 10**).

13

#### 14 **Metabolic regulation of PE and PG biosynthesis**

15 PssA is unique among the proteins of the Kennedy pathway since it is found both associated with the  
16 membrane and in the cytosol [30,31]. PssA is thought to maintain the ratio between acidic (PG and  
17 cardiolipin, CL) and zwitterionic (PE) lipids in *E. coli* by being activated upon association with PG/CL-  
18 rich membranes, whereas the cytosolic form is latent (**Fig. 2a**) [32,33]. We sought to exploit this  
19 feedback mechanism to provide membrane content homeostasis without relying on genetic control.  
20 LUVs with different amounts of DOPE and DOPG were prepared, and synthesis of <sup>13</sup>C-labelled DOPE  
21 and DOPG was determined by LC-MS, both in the presence and absence of SP6 RNAP (**Fig. 2b**,  
22 **Supplementary Fig. 11**). A clear positive correlation between initial PG content and yield of  
23 synthesized PE was observed, both in the presence ( $\rho = 0.91 \pm 0.07$ , mean  $\pm$  SD of three independent  
24 repeats) and absence ( $\rho = 0.94 \pm 0.04$ , mean  $\pm$  SD of three independent repeats) of SP6 RNAP.  
25 Moreover, a negative correlation between initial PG content and yield of synthesized PG was  
26 observed ( $\rho = -0.95 \pm 0.03$ , mean  $\pm$  SD of three independent repeats). These results confirm the  
27 model of allosteric regulation of PssA activity by PG content, providing non-genetic homeostasis of  
28 mixed lipid composition to our system. Interestingly, PE synthesis was reduced at low PG content,  
29 independent of the expression of the PG-synthesizing pathway branch (**Fig. 2c, Supplementary Fig.**  
30 **11**). This result indicates that the regulatory mechanism is not solely driven by competition between  
31 the two pathway branches but it relies also on the association-dissociation of PssA to the membrane  
32 (**Fig. 2a**). We also found that the total amount of synthesized PE and PG is ~2-fold higher at a higher  
33 mol% of initial PG (~18  $\mu$ M at 0 mol% PG vs. ~28  $\mu$ M at 35 mol% PG in the experiment shown in **Fig.**  
34 **2c**) (**Supplementary Fig. 11**). This result is in line with previous observations that PlsB activity is  
35 promoted by PG [34,35].

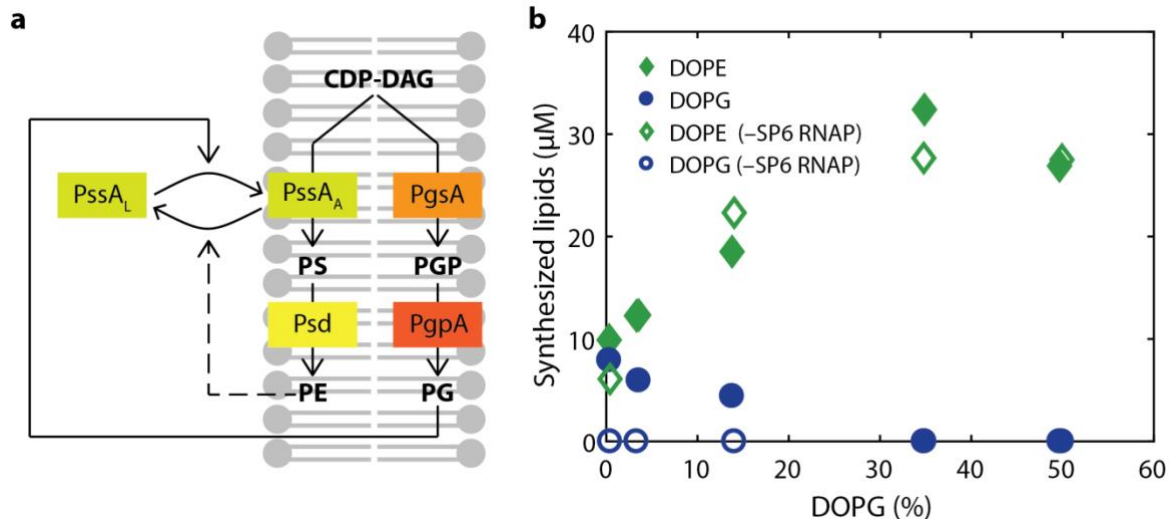

1  
2 **Figure 2: Metabolic feedback as a regulator for cell-free synthesis of PE and PG.** **a**, Schematic illustration of  
3 PssA activity regulation by membrane content. PssA exists in the membrane-bound, activated state (PssA<sub>A</sub>) and  
4 in the cytosolic, inactivated or latent state (PssA<sub>L</sub>). High amounts of PG favour PssA<sub>A</sub> by promoting membrane  
5 recruitment, thus increasing the yield of synthesized PE. Low PG content (i.e. high fraction of PE) shifts the  
6 equilibrium to PssA<sub>L</sub>, channelling resources to the production of PG and reducing the fraction of synthesized PE.  
7 **b**, Concentrations of synthesized PE and PG for different initial compositions of SUVs in the presence (filled  
8 symbols) or absence (empty symbols) of SP6 RNAP. Membranes always contain 50 mol% DOPC and varying  
9 fractions of DOPG and DOPE. Data from one representative experiment are displayed. Data from two additional  
10 repeats are shown in **Supplementary Fig. 11**. Source Data are available.

11

## 12 **Compartmentalised biosynthesis of PE and PG in liposomes**

13 Lipid synthesis localised inside individual liposomes is of paramount importance in the realization of  
14 autonomously growing artificial cells. The successful reconstitution of the seven gene-encoded  
15 enzymes for PE and PG synthesis in the presence of LUVs prompted us to confine the entire chain of  
16 reactions inside cell-sized liposomes that initially contain PE and PG lipids. PURE system, pGEMM7  
17 minigenome and soluble phospholipid precursors were encapsulated inside large and giant  
18 liposomes. Acyl-chain precursors were supplied as a dried film and, when suspended in the aqueous  
19 solution, partitioned in the membrane of liposomes. Cell-free gene expression was restricted to the  
20 liposome lumen by adding either proteinase K or DNase I in the external medium. In-liposome gene  
21 expression was first validated using the yellow fluorescent protein (YFP) as a reporter (**Fig. 3a,b**).  
22 Quantitative mass spectrometry analysis of synthesized lipid products showed that it is possible to  
23 synthesise up to 20 μM of phospholipid end products, corresponding to an acyl-CoA conversion yield  
24 of 40%, when all reactions are confined to the liposome lumen (**Fig. 3d**). Both acyl-chain precursors  
25 palmitoyl-CoA (16:0) and oleoyl-CoA (18:1) could be used as substrates, resulting in the synthesis of  
26 dipalmitoyl and dioleoyl phospholipids, respectively (**Fig. 3d, Supplementary Fig. 12**). Because the

1 newly synthesized DOPE and DOPG are also constituents of the parental liposomes, this result  
 2 represents a milestone towards homeostatic membrane growth directed from genomic DNA. Control  
 3 experiments without proteinase K (**Fig. 3d, Supplementary Fig. 12**) result in only slightly higher  
 4 phospholipid yields, despite the much larger reaction volume of the extravesicular space. This could  
 5 suggest a possible enhancement of gene expression and/or lipid synthesis by encapsulation inside  
 6 liposomes.

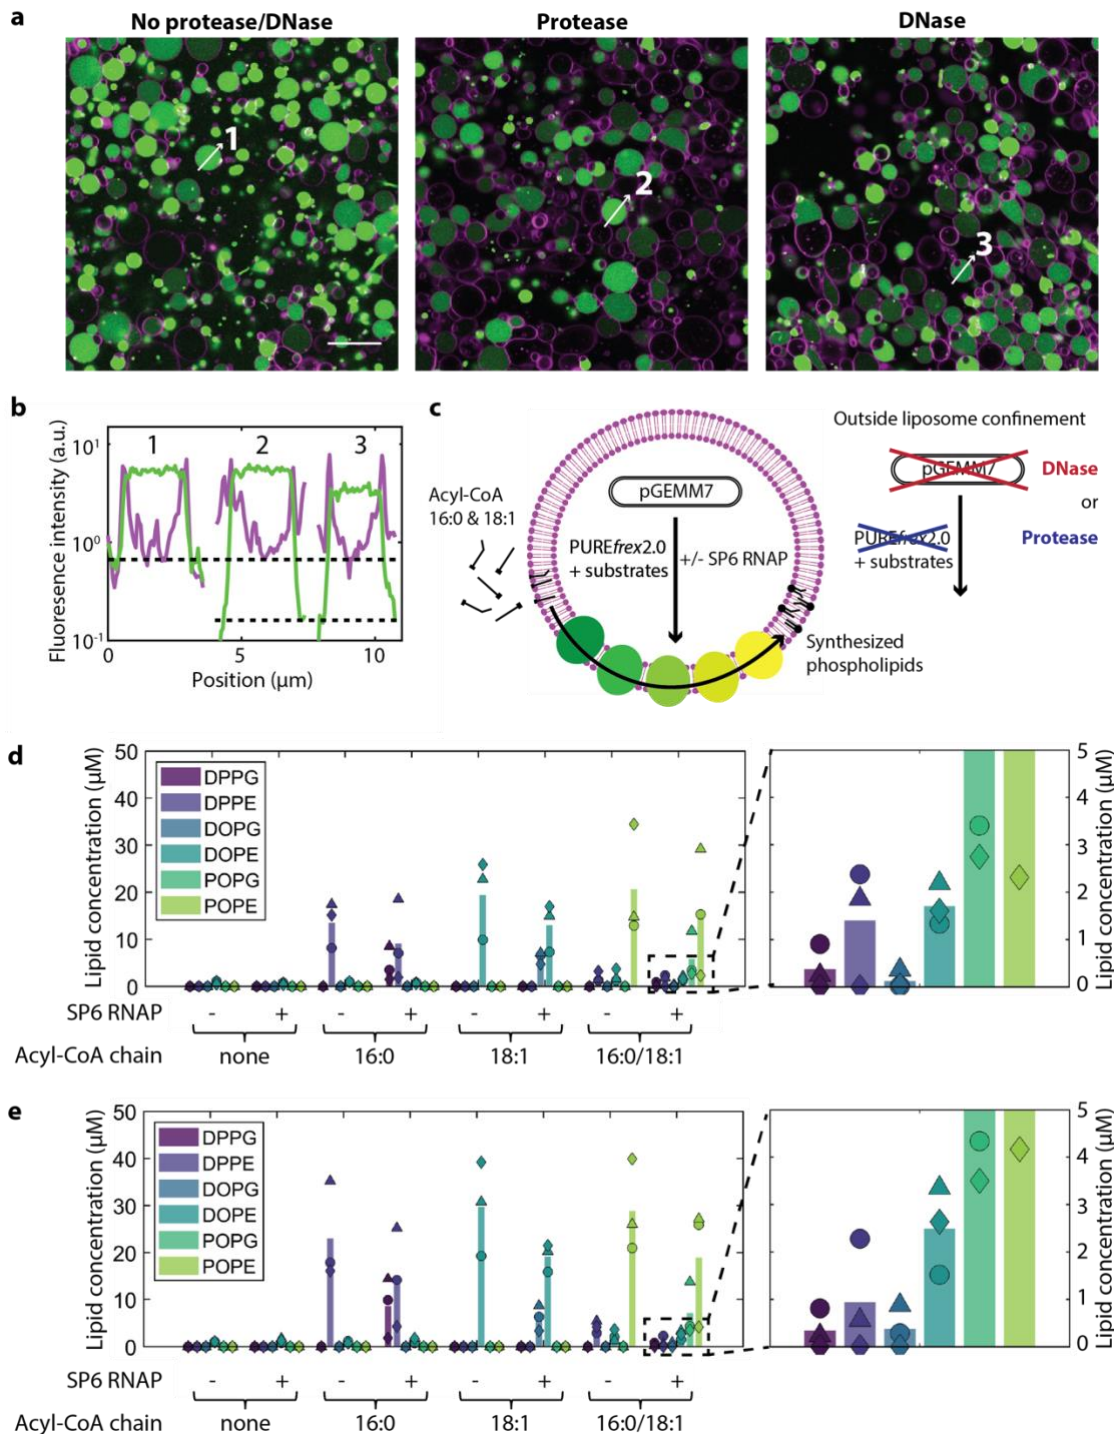

7  
8



1 **Figure 3: DNA-programmed phospholipid synthesis inside giant vesicles.** **a**, Fluorescence images of liposomes  
2 (membrane in magenta) encapsulating PURE<sub>frex2.0</sub>, 5 mM  $\beta$ -mercaptoethanol and 7 nM DNA encoding for the  
3 YFP (in green). Gene expression was confined inside liposomes by external addition of either proteinase K  
4 (middle) or DNase I (right), or was allowed to also occur outside liposomes (left). Scale bar indicates 20  $\mu$ m; all  
5 pictures have the same size. **b**, Fluorescence intensity line profiles for the liposomes indicated in **a**. Colour  
6 coding is the same as in **a**. Dotted black lines indicate the background YFP level without (top) and with (bottom)  
7 protease/DNase. **c**, Schematic representation of in-liposome gene expression coupled to phospholipid  
8 synthesis. **d,e**, Concentration of synthesized phospholipids inside (d) or both inside and outside liposomes (e),  
9 as determined by LC-MS. Compartmentalisation of gene expression was ensured by addition of proteinase K in  
10 the external environment. Different combinations of acyl-CoA precursors and SP6 RNAP were used.  
11 Concentrations of oleoyl-CoA and palmitoyl-CoA were 100  $\mu$ M when added separately, and 50  $\mu$ M each when  
12 added together. Symbols indicate measurements from three independent experiments and the bars represent  
13 mean values. A small amount of DOPE was measured in samples where no acyl-CoA was supplied. This  
14 represents the heavy-isotope fraction of the DOPE present in the initial liposome membrane. The right panels  
15 are blow-up graphs of the indicated area in the left panels. Source Data are available for panels d and e.

16

17 PG was only observed when the SP6 RNAP was co-encapsulated (**Fig. 3d,e**), demonstrating that  
18 genetic regulation of phospholipid synthesis occurs inside liposomes. In accordance with LUV  
19 experiments, activation of PG synthesis does not substantially decrease the amount of synthesized  
20 PE. In all cases, the final yield of PG was about two times lower than that of PE, mirroring the initial  
21 PE/PG ratio of the vesicle membranes. This result suggests that the homeostatic mechanism  
22 mediated by PssA takes place when lipid synthesis is compartmentalised inside liposomes. Moreover,  
23 we found evidence for accumulation of the phospholipid intermediates LPA, PA, and CDP-DAG, but  
24 not of PGP and PS (**Supplementary Fig. 12**).

25 We then aimed to expand the repertoire of synthesized phospholipids by mixing the 16:0 and  
26 18:1 acyl-CoA precursors in equimolar amounts. We found that  $82.9 \pm 0.4\%$  (without SP6 RNAP) and  
27  $79 \pm 11\%$  (with SP6 RNAP) of the total synthesized phospholipid end products contained mixed-chain  
28 products (PO) (**Fig. 3d, Supplementary Fig. 12**), which is significantly higher than the expected 50%  
29 assuming random chain incorporation. The fraction of synthesized dioleoyl ( $8.8\% \pm 0.4\%$  without SP6  
30 RNAP,  $11\% \pm 9\%$  with SP6 RNAP) and dipalmitoyl ( $8.2\% \pm 0.3\%$  without SP6 RNAP,  $9\% \pm 5\%$  with SP6  
31 RNAP) species was consequently low but appreciable. Concluding, it has been possible to selectively  
32 produce up to six different lipid species (DOPE, DOPG, DPPE, DPPG, POPE, POPG) with a one-pot gene  
33 expression-coupled phospholipid synthesis encapsulated in cell-sized liposomes.

34

35

36

## 1 **Direct visualization of gene-encoded membrane synthesis in individual liposomes**

2 In-liposome gene expression is subjected to high heterogeneity even when a single protein is  
3 produced from a high copy number of encapsulated DNA molecules [36]. While LC-MS methods  
4 provide sensitive detection of multiple lipid species in a liposome population, information about lipid  
5 composition at the single vesicle level is hidden in ensemble measurements. To overcome this  
6 limitation and to quantify the fraction of phospholipid-producing liposomes as well as the degree of  
7 heterogeneity, we established two fluorescence-based imaging assays. Moreover, optical microscopy  
8 methods gave us the opportunity to confirm our assumption that synthesized lipids are incorporated  
9 into the liposome membrane.

10 The first approach was based on the use of the nitrobenzoxadiazole (NBD)-labelled palmitoyl-  
11 CoA as a fluorescent substrate for phospholipid synthesis (**Fig. 4a**). The integration of the NBD-  
12 labelled acyl chain into the different enzymatic products was analysed by high-performance liquid  
13 chromatography (HPLC) (**Fig. 4b**). Peak assignment was realized by monitoring chromatograms of  
14 samples when only parts of the enzymatic pathway were expressed in the presence of LUVs. New  
15 peaks appearing after addition of a gene coding for an enzyme downstream the pathway were  
16 assumed to correspond to the final reaction product. In this way, signatures for the NBD-labelled PA,  
17 PS, and PE could unambiguously be identified (**Fig. 4b,c**). Furthermore, NBD-labelled PA and PE were  
18 detected when pGEMM7 was expressed inside cell-sized liposomes (**Fig. 4b**). These results  
19 demonstrate the versatility of our platform to synthesize novel lipid species.

20 Next, we performed fluorescence microscopy experiments to image the membrane  
21 localisation of newly synthesized NBD-labelled phospholipid species from the interior of liposomes.  
22 We reasoned that two-acyl chain phospholipid products conjugated to NBD are more stably inserted  
23 in the bilayer than mono acyl species (NBD-palmitoyl-CoA and NBD-LPA) that have a faster exchange  
24 rate between the membrane and the bulk phase. Therefore, a more intense NBD signal at the  
25 liposome membrane is expected upon successful lipid production. A mixture of palmitoyl-CoA and  
26 NBD-palmitoyl-CoA (9:1 molar ratio) was used as acyl-chain precursors. This ratio was chosen to  
27 minimize the chance of incorporating two NBD-labelled chains in one phospholipid, which might  
28 result in fluorophore quenching, whilst yielding to a sufficiently high fraction of NBD-labelled  
29 phospholipids for imaging. After pGEMM7 expression, the liposomes were diluted to reduce the  
30 membrane signal coming from NBD-palmitoyl-CoA and NBD-LPA. Background signal resulting from  
31 the transient interaction of NBD-palmitoyl-CoA with the vesicles was assayed in control samples  
32 where proteinase K was supplemented both inside and outside liposomes to totally inhibit gene  
33 expression (**Supplementary Fig. 13**). NBD-enriched liposomes, i.e. liposomes that successfully  
34 converted NBD-palmitoyl-CoA into two-acyl compounds were analysed. Expression of pGEMM7  
35 inside liposomes led to a higher NBD signal at the membrane (**Supplementary Fig. 13**) and to a higher

1 percentage of NBD-enriched liposomes than in the control sample (**Fig. 4d**) demonstrating  
 2 phospholipid biosynthesis at the single vesicle level.

3

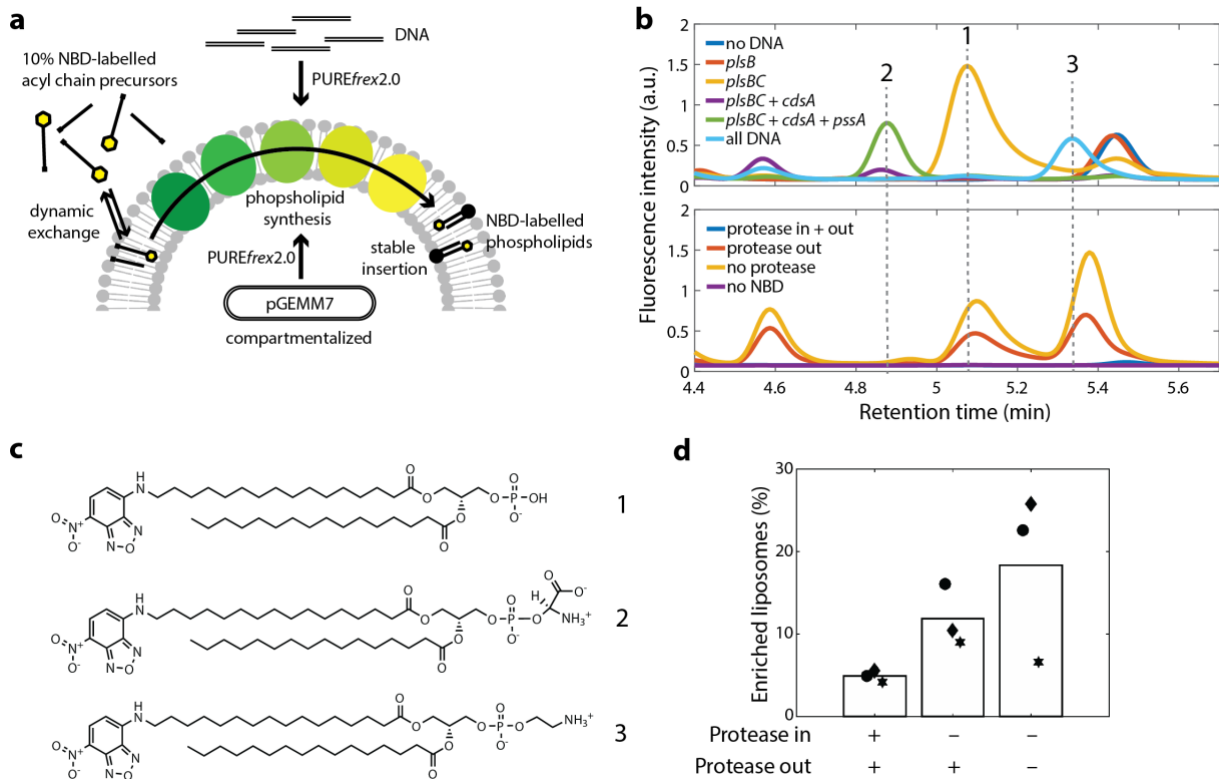

4

5

6 **Figure 4: Cell-free biosynthesis of NBD-labelled phospholipids.** **a**, Schematic illustration of the conversion of  
 7 NBD-labelled acyl chain precursors into newly synthesized membrane-bound phospholipids. NBD-labelled acyl-  
 8 CoA molecules undergo dynamic exchange between the membrane and the aqueous solution. Upon processing  
 9 of the lipid precursors by the five-enzyme pathway, membrane-stable NBD-labelled PE is formed and an  
 10 increase in NBD fluorescence at the liposome membrane is expected. Either PCR fragments of the individual  
 11 genes or pGEMM7 were used as DNA templates and no SP6 RNAP was introduced. The precursor mix consisted  
 12 of 10% (in mol) NBD-labelled palmitoyl-CoA and 90% palmitoyl-CoA. Cell-free gene expression was either  
 13 performed outside LUVs or it was compartmentalised inside giant vesicles, as indicated. **b**, HPLC  
 14 chromatograms of NBD-conjugated species detected when single and multiple genes of the pathway are  
 15 expressed in the presence LUVs (top), and when pGEMM7 in expressed inside giant vesicles (bottom). The  
 16 different gene combinations allowed us to assign peaks to specific lipid end products. Clear peaks were found  
 17 for NBD-labelled DPPA (peak 1, *plsB* and *plsC*), NBD-labelled DPPS (peak 2, *plsB*, *plsC*, *cdsA*, and *pssA*), and NBD-  
 18 labelled DPPE (peak 3, *plsB*, *plsC*, *cdsA*, *pssA*, and *p<sub>s</sub>d*, labelled 'all DNA'). In the giant vesicle assay (bottom),  
 19 proteinase K was either added to the inside of liposomes (no lipid synthesis), to the outside of liposomes (lipid  
 20 synthesis confined to the liposome lumen), or it was omitted. NBD-labelled DPPA and NBD-labelled DPPE could  
 21 be observed. **c**, Chemical structures of NBD-labelled DPPA (1), NBD-labelled DPPS (2), and NBD-labelled DPPE  
 22 (3). **d**, Percentage of NBD-enriched liposomes, i.e. liposomes that successfully converted NBD-palmitoyl-CoA

1 into two-acyl compounds, was calculated by analysing line profiles of single liposomes imaged by fluorescence  
2 confocal microscopy (**Supplementary Fig. 13**). NBD-enrichment was defined when the mean NBD peak  
3 fluorescence for a given liposome is higher than the mean plus two standard deviations of the signal in the  
4 'proteinase K in' negative control. Conditions correspond to the giant vesicle experiment shown in **b** (bottom).  
5 Bars are mean values from three independent experiments. Symbols indicate data points from individual  
6 repeats. A total of 741, 613, and 505 line profiles were analysed (from left to right). Source Data are available.

7  
8 The second strategy to detect lipid synthesis and membrane incorporation relies on the C2-  
9 domain of lactadherin fused to eGFP (LactC2-eGFP) as a PS-specific fluorescent reporter [37] (**Fig. 5a**,  
10 **Supplementary Fig. 14 and 15**). At a concentration of 150 nM, LactC2-eGFP binds to PS-containing  
11 membranes, but not to membranes where PS was substituted by PG (**Supplementary Fig. 15**). PS is  
12 not an end-product of our reconstituted lipid synthesis pathway and is rapidly converted by Psd into  
13 PE (**Supplementary Fig. 10 and 12**). To enable accumulation of PS, the plasmid DNA pGEMM7 was  
14 linearized using *EcoRI* that cuts at a unique restriction site located in the *psd* gene (**Supplementary**  
15 **Fig. 16**). The only end-product of the pathway encoded by the resulting construct (named  
16 pGEMM7 $\Delta$ *psd*) is PS, when the SP6 RNAP is not added. Using pGEMM7 $\Delta$ *psd* as a template for in-  
17 liposome gene expression led to significant accumulation of PS, as detected by LC-MS  
18 (**Supplementary Fig. 16**). Some residual PE synthesis was also measured, most likely as the result of  
19 incomplete restriction of the *psd* gene (**Supplementary Fig. 16**). When LactC2-eGFP was added to the  
20 feeding solution to probe PS production in individual liposomes, a clear recruitment to the  
21 membrane of some liposomes was observed (**Fig. 5b,c**), indicating PS-enrichment. No significant  
22 membrane binding of LactC2-eGFP was observed when omitting either oleoyl-CoA or the pGEMM7  
23 template (**Fig. 5b,d**), corroborating the high PS specificity. Automated image analysis allowed us to  
24 extract the average rim intensity of eGFP in a large number of liposomes. A wide distribution of eGFP  
25 intensity values in PS-synthesizing liposomes was measured (**Fig. 5d**) with a coefficient of variation  
26 ~2-fold higher than in control samples (**Supplementary Fig. 17**), further supporting the highly  
27 heterogeneous nature of liposome-encapsulated lipid synthesis. Moreover, we found that ~50% of  
28 the liposomes exhibited PS enrichment (**Fig. 5e**). Similar results were obtained when LactC2 was  
29 fused to mCherry in place of eGFP (**Supplementary Fig. 17 and 18**). We noticed that this approach is  
30 more robust and provides higher signal-to-background ratio than the use of an NBD-labelled acyl  
31 precursor. Moreover, no washing steps are necessary, making LactC2-eGFP a superior lipid probe to  
32 obtain kinetic information by real-time fluorescence imaging of individual liposomes. **Fig. 5f,g** shows  
33 a representative liposome imaged at six time points. Between 0.5 and 6 h, a clear increase in LactC2-  
34 eGFP signal at the membrane can be observed. Plotting fluorescence intensity over time for 47  
35 liposomes from three independent experiments shows a sigmoidal profile representing synthesis and

1 membrane incorporation of PS, with a plateau time of  $\sim 4.5 \pm 2.5$  h and a rate of  $9.2 \pm 6.9$  a.u. per  
 2 minute (**Supplementary Note 3, Supplementary Fig. 19**). No clear dependency of the kinetic  
 3 parameters with respect to the liposome size was observed for vesicles with an apparent diameter  
 4 ranging between 4 and 12  $\mu\text{m}$  (**Fig. 5g, Supplementary Fig. 19**). In addition, the amount of de novo  
 5 synthesized lipids incorporated in the membrane was not sufficient for directly observing liposome  
 6 growth under an optical microscope. When oleoyl-CoA was omitted, no increase of the LactC2-eGFP  
 7 signal intensity was observed, confirming the specificity for synthesized PS. Further investigations will  
 8 be necessary to elucidate the rate limiting step of the LactC2-eGFP signal increase and the cause of  
 9 saturation. In particular, it would be insightful to examine if LactC2-eGFP recruitment saturates due  
 10 to cessation of PS production.  
 11

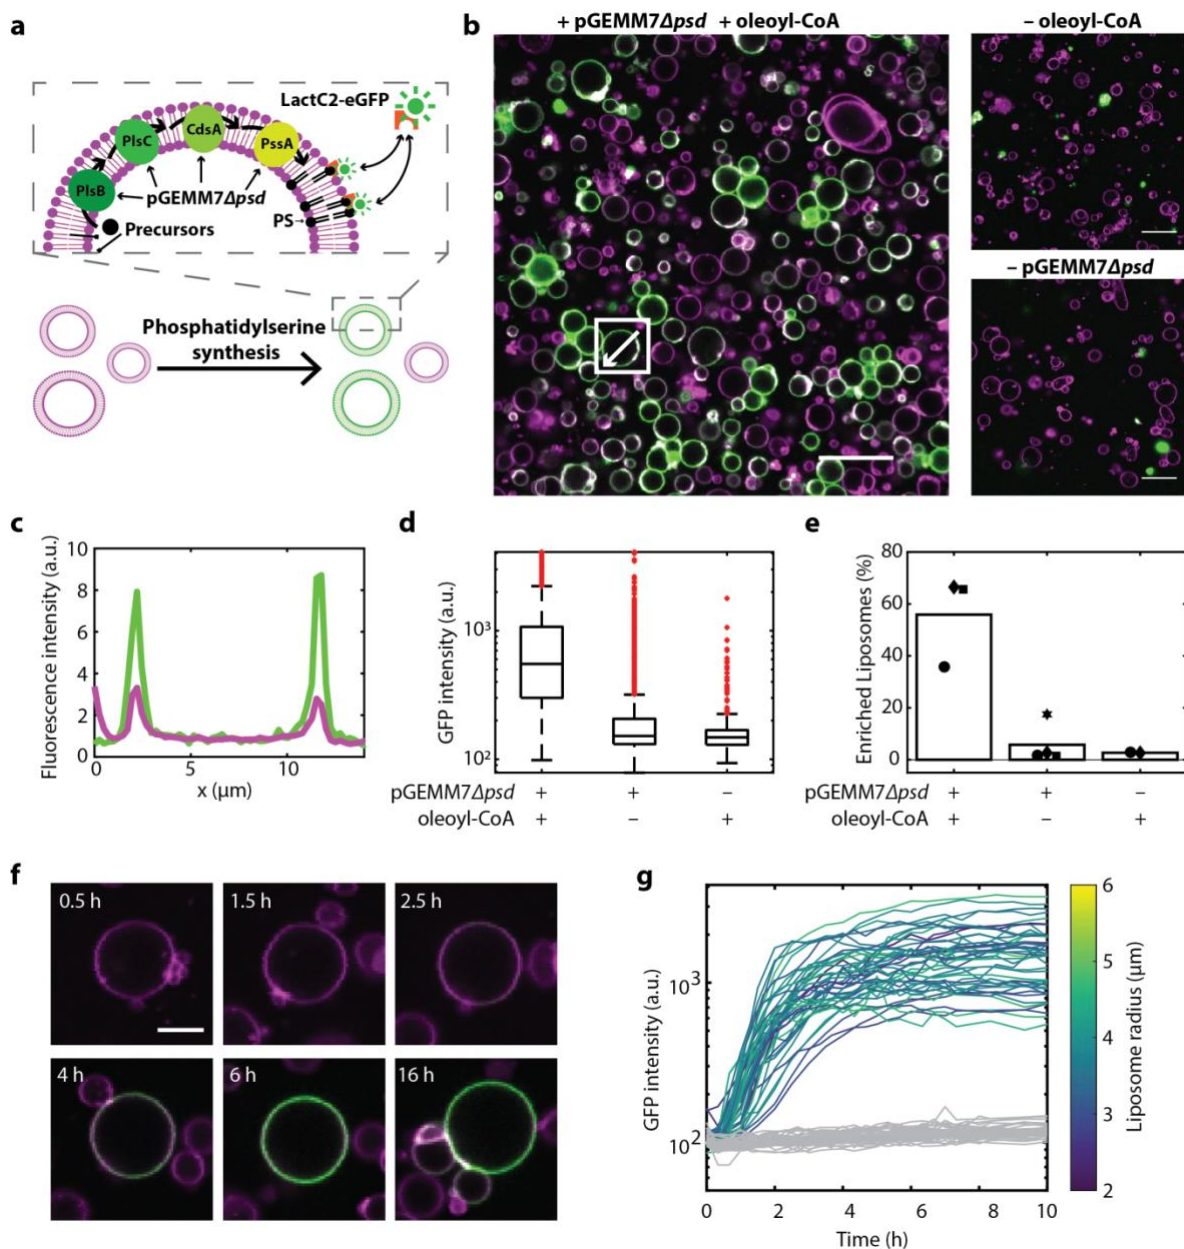

12

1 **Figure 5: Single-vesicle imaging of internal PS production using LactC2-eGFP.** **a**, Schematic representation of  
2 gene expression-coupled PS biosynthesis inside liposomes and fluorescence imaging using the PS-specific  
3 LactC2-eGFP probe. The linear pGEMM7 $\Delta$ *psd* template was expressed within giant vesicles to produce the PlsB,  
4 plsC, CdsA and PssA enzymes which catalyse formation of PS from acyl-CoA and G3P. Membrane-exposed PS  
5 recruits the fluorescent reporter LactC2-eGFP, resulting in accumulated GFP signal in PS-enriched liposomes. **b**,  
6 Fluorescence confocal images of liposomes (membrane dye in magenta) producing DOPS from oleoyl-CoA, as  
7 illustrated in a. The externally added LactC2-eGFP binds to PS-containing liposomes and stain the membrane in  
8 green. In a series of negative control experiments, oleoyl-CoA was omitted, or the pGEMM7 $\Delta$ *psd* DNA was  
9 replaced by a DNA coding for an unrelated protein, namely the terminal protein of the phi29 phage [50]. Bright  
10 spots of clustered LactC2-eGFP molecules that do not co-localise with liposomes are sometimes visible. The  
11 LactC2-mCherry variant showed less propensity to form clusters than the eGFP fusion protein (**Supplementary**  
12 **Fig. 18**) and similar quantitative results were obtained with the two reporters (**Supplementary Fig. 17, 18**). **c**,  
13 Line profiles of LactC2-eGFP intensity (green) and Texas Red membrane dye intensity (magenta) of the  
14 liposome highlighted in b. **d**, Box-plot representation of the single-vesicle average LactC2-eGFP intensity values  
15 for the indicated samples. Data were pooled from four independent experiments for each condition,  
16 corresponding to 4048, 3642 and 569 liposomes analysed (from left to right). **e**, Percentage of PS-enriched  
17 liposomes for the three types of samples analysed in d. Values represent the mean  $\pm$  inter-sample standard  
18 deviation from four biological repeats. Liposomes were defined as enriched in PS if their average LactC2-eGFP  
19 intensity is higher than the mean plus two standard deviations of the intensity distribution obtained with  
20 liposomes containing 0% PS (see **Supplementary Fig. 15**). **f**, Time-lapse images of a liposome exhibiting  
21 increasing LactC2-eGFP signal over time. Scale bar is 5  $\mu$ m; picture size is identical for all images. **g**, Single-  
22 liposome kinetics of LactC2-eGFP binding for 47 PS-synthesizing liposomes, colour-coded with respect to the  
23 liposome radius (aggregated data from three independent repeats), and for 28 liposomes in a control sample  
24 that does not contain oleoyl-CoA (grey curves). Source Data are available for panels d, e, g.  
25

## 26 **DISCUSSION**

27 We demonstrated here that an entire bacterial phospholipid synthesis pathway can be reconstituted  
28 inside liposomes by expressing seven membrane-associated enzymes from their genes concatenated  
29 on a DNA minigenome. Because the internally synthesized PE and PG lipids are also constituents of  
30 the liposome membrane, our synthetic cell platform satisfies the key requirements for self-  
31 maintenance. Moreover, higher-level regulation of membrane composition was provided through  
32 genetic control and metabolic feedback mechanisms, two processes that have so far been considered  
33 to be exclusive attributes of living organisms. The average PE-to-PG ratio could be maintained within  
34 the liposome population during phospholipid production, which is important to achieve homeostatic  
35 membrane growth.

1 To realize a full proliferation cycle, all membrane constituents should be co-synthesized. Here,  
2 we showed internal production of DOPE and DOPG, two out of the four membrane building blocks.  
3 Synthesis of the two other lipids, namely PC and CL, would require the reconstitution of only two  
4 additional proteins, PmtA and ClsA, respectively [38,39].

5 Besides having clear implications to creating a synthetic minimal cell, we envisage that our  
6 engineered liposomes could serve as a versatile platform for tailored biosynthesis of natural and  
7 artificial phospholipids of industrial or biotechnological value, such as lipids with asymmetric acyl  
8 chain compositions and acyl-labelled phospholipid analogues (**Supplementary Table 7**).

9 Single vesicle imaging revealed that a significant fraction of the liposomes does not display a  
10 lipid enrichment (**Fig. 4d, Fig. 5b,e**). Moreover, a large heterogeneity in the level of synthesized  
11 phospholipids was observed among liposomes (**Fig. 5d, Supplementary Fig. 17**). Such a functional  
12 heterogeneity within a population of PURE system-containing liposomes has been reported in other  
13 studies [36,40-42] and is inherent to gene expression in cell-sized compartments.

14 Synthesis of phospholipids from an inner machinery and their incorporation in the lipid bilayer  
15 inevitably results in liposome growth. However, no visible membrane or volume expansion could  
16 unambiguously be measured by optical microscopy. It is clear that the amount of synthesized lipids  
17 per liposome should be increased to achieve doubling of the membrane surface area, which is  
18 necessary for sustainable proliferation. We envisage two complementary strategies to overcome this  
19 limitation, one acting at the gene expression level, the other one at the lipid biosynthesis level. First,  
20 one could strive to improve the PURE system performance for producing larger amounts of the  
21 encoded enzymes in liposomes. Given the limited knowledge about the biochemical steps governing  
22 PURE system reactions [43], it remains however challenging to find generic solutions for improved  
23 DNA sequence design and composition of the PURE system.

24 Another factor that might limit the final amount of synthesized phospholipids is the initial  
25 concentration of acyl-CoA, absolute and relative with respect to the concentration of liposomes.  
26 Adding more than 100  $\mu\text{M}$  acyl-CoA is hardly feasible due to its poor solubility in the presence of high  
27 concentration of  $\text{Mg}^{2+}$  contained in the PURE system and to its detergent effect on liposome  
28 membranes. One solution would be to provide continuous supply of low-concentration acyl-CoA.  
29 Alternatively, more soluble precursors, such as the acyl-ACP, fatty acids and malonyl-CoA could be  
30 used. Preliminary experiments showed that purification of acyl-ACP up to significantly high  
31 concentrations is difficult and that its use as a substrate is less efficient than with acyl-CoA  
32 (**Supplementary Fig. 20**). Expanding the pathway upstream by introducing the FadD enzyme would  
33 enable to substitute acyl-CoA with a fatty acid and CoA [19]. Although co-expression of the *fadD* gene  
34 and pGEMM7 succeeded in producing PE and PG lipids from oleic acid at similar yield as in reactions  
35 starting with acyl-CoA, the percentage of converted substrate was low under the tested conditions

1 **(Supplementary Fig. 21)**. Finally, the highly soluble malonyl-CoA could be used as a substrate  
2 provided the eukaryotic FASII mega-protein can be synthesized in a functional state in the PURE  
3 system [44].

4 Alternatively, chemical synthesis of non-natural phospholipids has emerged as an interesting  
5 strategy because of its high yield and quick conversion [10-12]. Chemical synthesis could potentially  
6 be coupled to one or more enzymatic reactions, resulting in a hybrid system equipped with genetic  
7 control facilitating rapid lipid synthesis [45]. A radically different approach would consist to use  
8 alternative membrane constituents, such as amphiphilic peptides, that would be expressed from the  
9 inside of the vesicle [46].

10 DNA-programmed lipid synthesis could be exploited as a rudimentary mechanism to trigger  
11 division of liposomes. Budding events reminiscent of the proliferation mode of L-form bacteria [47]  
12 could be stimulated through an excess membrane synthesis, potentially aided by gentle shear forces.  
13 Furthermore, internal synthesis of membrane remodelling phospholipids like DLPE, produced when  
14 starting from the short-chain 12:0 acyl-CoA, in combination with temperature cycling [48], might  
15 assist vesicle deformation and division.

16 It has not escaped our attention that liposome-confined DNA-based phospholipid production,  
17 combined with the fluorescently tagged LactC2 as a selection marker, is amenable to directed  
18 evolution experiments, owing to the linkage between genotype and phenotype. Activity of single or  
19 multiple enzymes in the pathway, or substrate selectivity, could be improved by generating a library  
20 of mutagenized genes and selecting for PS-enriched liposomes by fluorescence activated cell sorting  
21 [49]. This strategy may become decisive when combining membrane growth with other functional  
22 modules, such as DNA replication [50] and liposome division [51].

23

## 24 **METHODS**

25 All buffers and solutions were made using Milli-Q grade water with 18.2 MΩ resistivity (Millipore,  
26 USA). Chemicals were purchased from Sigma-Aldrich unless otherwise indicated.

### 27 **Design and assembly of the pGEMM7 plasmid**

28 The plasmid pGEMM7 was assembled from seven PCR fragments containing independent  
29 transcriptional cassettes and the plasmid backbone of pUC19 (New England Biolabs, USA)  
30 **(Supplementary Table 1)**. The genes were used in a previous study with each gene inserted in a  
31 separate DNA construct [21]. Individual genes were amplified by PCR using primers containing linker  
32 sequences to determine the order and orientation of each cassette in the final plasmid. Linker  
33 sequences of 30 bp were designed by a random DNA generator such that they had no or little  
34 homologies to the *E. coli* genome (R20DNA designer, <https://www.syntegron.org/R20/R20/R20.html>,



1 Imperial college London) to minimize unwanted recombination events. The vector backbone was  
2 amplified using primers 829 and 830 giving a 1,932 bp product bearing either linker site 1 or 13 on  
3 the ends. The transcriptional cassette of *plsB* was amplified using primers 628 and 629 introducing  
4 linker site 1 upstream of the gene and linker site 2 downstream. All other remaining transcriptional  
5 cassettes were made in the same way adding linker sequences both upstream and downstream of  
6 the cassette to enable each cassette to be recombined with the next one by Gibson assembly [29].  
7 Primer 819 also adds an SP6 promoter to the *pgsA* gene as well as a linker sequence. The second SP6  
8 promoter sequence was added to the *pgpA* gene in a previous step using primer 817. The  
9 homologous site that was added using primer 817 was deleted in a subsequent PCR using primer  
10 851. **Supplementary Figure 1** shows a schematic drawing of the two-step process to incorporate the  
11 homologous linker sites by PCR and then using the individual fragments to assemble pGEMM7. The  
12 primers, their targets and the homologous site they are bearing are listed in **Supplementary Table 2**.

13

#### 14 **Cloning of the pGEMM7 plasmid**

15 All fragments for Gibson assembly were amplified using Phusion High-fidelity DNA polymerase (New  
16 England Biolabs, USA) with the recommended standard reaction conditions from the supplier.  
17 Elongation times and primer annealing temperatures were varied according to primer length  
18 between 55 °C and 65 °C. Primers and remnants of the PCR reaction were removed using the Wizard  
19 PCR cleanup kit (Promega, USA). The concentration of the purified DNA was determined using an ND-  
20 2000 NanoDrop spectrophotometer. Purified PCR products were mixed following the pipetting  
21 scheme in **Supplementary Table 3** plus 15 µL of prepared Gibson assembly mix containing 100 mM  
22 Tris-HCl, 50 mM MgCl<sub>2</sub>, 0.2 mM each dNTP, 10 mM dithiothreitol (DTT), 5% w/v PEG-8000, 1 mM  
23 NAD, 5.33 U mL<sup>-1</sup> T5 Exonuclease, 33.3 U mL<sup>-1</sup> Phusion polymerase and 5.33 U mL<sup>-1</sup> Taq-ligase in a  
24 final volume of 20 µL. The Gibson assembly mixture was incubated at 50 °C for 1 h and 5 µL were  
25 subsequently used for transformation of 50 µL One Shot™ TOP10 Chemically Competent *E. coli* cells  
26 (ThermoFisher Scientific, USA).

27 Transformed cells were recovered in 1 mL LB medium for 1 h and transferred on LB-Agar plates  
28 containing 50 µg mL<sup>-1</sup> ampicillin. After overnight incubation at 37 °C, 10 colonies were selected for  
29 colony PCR using primers 91 and primers 397 which bind in the T7 terminator region and the RBS,  
30 respectively. Four of the tested colonies gave the expected pattern (**Supplementary Figure 3a**) and  
31 were subsequently grown overnight in LB medium. Their plasmid DNA was isolated using a PureYield  
32 miniprep kit (Promega, USA) and was further analysed with restriction digestion using the enzymes  
33 EcoRI-HF, SacI and DraI (New England Biolabs, USA). **Supplementary Figure 3b** shows that all four  
34 colonies gave the expected pattern consisting of digestion products of 4,300 bp, 2,836 bp, 1,863 bp,  
35 1,395 bp, 692 bp and 19 bp (indicated by black stars, only the 19-bp product was not visible), plus

1 some side products attributed to incomplete DNA digestion. The correct DNA sequence was finally  
2 confirmed with Sanger sequencing (Macrogen, Korea).

3

#### 4 **Cloning of *eGFP-lactC2* and plasmid purification**

5 The original plasmid containing the *egfp-lactC2* gene was described in [37] and was kindly provided  
6 by the lab of Dorus Gadella (University of Amsterdam, Netherlands). To enable expression and  
7 isolation from *E. coli* regular PCR reactions were performed to amplify both the plasmid backbone of  
8 a pET11a vector and the *egfp-lactC2* gene construct. Primers 471 (forward) and 850 (reverse) were  
9 used for the amplification of the pET-11a backbone. Primers 848 (forward) and 849 (reverse) were  
10 used for the amplification of *egfp-lactC2*. The reaction was performed with 10 ng of template DNA, 1  
11 U of Phusion High-Fidelity DNA Polymerase (New England Biolabs) in HF buffer and supplemented  
12 with 0.2 mM of dNTPs, 0.2  $\mu$ M of both forward and reverse primers in a final volume of 50  $\mu$ L. An  
13 initial heating step at 95 °C for 5 min was applied to allow denaturation of DNA. The PCR reaction  
14 consisted of 34 cycles of 30 s steps for melting DNA at 95 °C, followed by the hybridization of the  
15 primers for 30 s at 55 °C and the elongation by the DNA polymerase at 72 °C for 30 s per kb template.  
16 After the 34 cycles, the temperature was kept at 72 °C for 5 min. Both PCR products were purified  
17 using the Wizard PCR cleanup kit (Promega, USA).

18 The size of the PCR products was verified on an TAE agarose gel (1% w/v) using SybrSafe  
19 staining (Thermo Fisher). The BenchTop 1-kb DNA Ladder from Promega was used. The fragments  
20 corresponding to the adequate sequence lengths of 1.3 kb and 5.6 kb were excised from the gel and  
21 purified using the Promega Wizard SV Gel and PCR Clean-Up System kit. DNA concentration of the  
22 eluate was determined by measuring the absorbance at 260 nm with a NanoDrop 2000c.

23 The pET-11a backbone and *egfp-lactC2* gene fragments were assembled using Gibson  
24 assembly [29]. 100 ng of backbone and an equimolar amount of the *egfp-lactC2* PCR fragment were  
25 mixed in a solution containing 100 mM Tris-HCl, 50 mM MgCl<sub>2</sub>, 0.2 mM each dNTP, 10 mM  
26 dithiothreitol (DTT), 5% w/v PEG-8000, 1 mM nicotinamide adenine dinucleotide, 5.33 U mL<sup>-1</sup> T5  
27 Exonuclease, 33.3 U mL<sup>-1</sup> Phusion polymerase and 5.33 U mL<sup>-1</sup> Taq-ligase in a final volume of 20  $\mu$ L.  
28 The assembly reaction was incubated at 50 °C for 60 min. Then, 20 U  $\mu$ L<sup>-1</sup> of DpnI restriction enzyme  
29 (New England Biolabs, USA) were added to digest possible methylated DNA left and the mixture was  
30 incubated for an additional 15 min at 37 °C.

31 5  $\mu$ L of the assembly mixture were transformed into 50  $\mu$ L of One Shot™ TOP10 chemically  
32 competent *E. coli* cells using heat shock. The cells were heat shocked in a water bath at 42 °C for 45 s  
33 and then transferred back to ice for 2 min, to reduce cell damage. After incubation in 1 mL of LB  
34 medium (1:20 dilution) for 20 min at 37 °C, 50  $\mu$ L of the cell suspension were spread in LB plates

1 supplemented with 50  $\mu\text{g mL}^{-1}$  ampicillin. The remaining sample was pelleted, re-suspended in 50  $\mu\text{L}$   
2 of LB medium and plated. All plates were incubated overnight at 37 °C.

3 Six colonies were picked to perform colony PCR and a replica plate was made. A PCR reaction  
4 was performed with 0.5 U of GoTaq DNA Polymerase in GoTaq Buffer (both from Promega)  
5 supplemented with primers and dNTPs to a final volume of 20  $\mu\text{L}$ . Adequate forward and reverse  
6 primers (25 and 310, respectively) were chosen to amplify the gene region and part of the backbone  
7 sequence upstream and downstream of the gene (**Supplementary Table 2**). DNA was purified using  
8 the Promega Wizard® SV Gel and PCR Clean-Up System and analysed on gel. Colonies leading to a  
9 band with the predicted length (6.9 kb) were grown in 5 mL LB medium overnight and plasmid DNA  
10 was isolated using the PureYield Plasmid Miniprep System (Promega). The plasmids were further  
11 tested by a restriction enzyme digestion analysis, in which 2.5 U of DraI and 2.5 U of StuI were mixed  
12 with 500 ng of DNA, in a final volume of 20  $\mu\text{L}$  (both enzymes were from New England Biolabs). The  
13 mixture was then incubated at 37 °C for 1 h. Digested DNA was separated in TAE agarose gel (1%).

14 To infer the quality of the construct on the sequence level, DNA extracted from the six colonies  
15 was sequenced by Sanger sequencing (Macrogen). To 300 ng of plasmid DNA, 0.25  $\mu\text{M}$  of adequate  
16 primers (288 and 25, **Supplementary Table 2**) were added, in a final volume of 10  $\mu\text{L}$ . Plasmids with  
17 the correct sequence were selected.

18

### 19 **Overexpression and purification of LactC2-eGFP and LactC2-mCherry**

20 *E. coli* Rosetta ER2566 cells (New England Biolabs) and Rosetta 2 cells (Novagen) suited for protein  
21 overexpression were transformed with the plasmid for LactC2-eGFP by heat shock. The plasmid for  
22 LactC2-mCherry was transformed into Rosetta 2 cells and isolated in the same way as described  
23 below. A preculture of these strains was incubated overnight at 37 °C in LB medium supplemented  
24 with 50  $\mu\text{g L}^{-1}$  ampicillin. Then, the cultures were diluted in the same medium in a ratio of 1:1000 and  
25 incubated at 37 °C with agitation (200 rpm) until an OD(600 nm) of  $\sim 0.6$  was reached. Protein  
26 production was induced with 1 mM isopropyl  $\beta$ -D-1-thiogalactopyranoside. The cells were incubated  
27 at 30 °C for 3 h under agitation (200 rpm) and were pelleted by centrifugation at 13,000 rpm for 5  
28 min. The pellet was resuspended in buffer A (150 mM NaCl, 20 mM imidazole, 20 mM Tris pH, 7.5)  
29 and the cells were disrupted by sonication using ten pulses of 10 s and 30 s of interval, with 30%  
30 amplitude. After centrifugation at 4 °C for 15 min and 13,000 rpm, the supernatant was cleared from  
31 debris.

32 Protein purification was done using Ni-NTA Spin Columns (Qiagen) following the supplier  
33 recommendations. The column was equilibrated and washed with buffer A and the protein was  
34 eluted with buffer B (150 mM NaCl, 500 mM imidazole, 20 mM Tris, pH 7.5). The elution buffer was  
35 exchanged for the storage buffer (10 mM Hepes-KOH, pH 7.5) using Zeba Spin Desalting Columns

1 (ThermoFischer). This size exclusion chromatographic spin down columns retain small molecules (<1  
2 kDa) and recover mostly large molecules (>7 kDa). Throughout all the steps of protein purification  
3 and buffer exchange, samples were harvested for subsequent analysis in polyacrylamide gels.

4 The 12% polyacrylamide resolving gel and the 4% stacking gel were prepared with final  
5 concentrations of 0.12% of sodium dodecylsulfate, 150 mM of Tris-HCl pH 8.8 for the resolving gel  
6 and 10 mM of Tris-HCl pH 6.8 for the stacking gel. Ammonium persulfate and  
7 tetramethylethylenediamine were added after to begin polymerisation. The loading solution  
8 consisted of 15  $\mu$ L of the protein sample mixed with 1  $\mu$ L DTT and 15  $\mu$ L Laemmli 2 $\times$  Concentrate  
9 Loading Buffer (Sigma-Aldrich), and denatured at 95  $^{\circ}$ C for 10 min. The gel was run first at 100 V for  
10 15 min and then at 180 V for approximately 45 min. Running buffer consisted of 250 mM Tris-HCl,  
11 200 mM glycine, 1% w/v SDS, pH 8.3.

12 Concentration of the protein was measured with a Bradford assay. Bovine serum albumin was  
13 used as a standard spanning seven concentrations from 0.25 mg mL<sup>-1</sup> to 2 mg mL<sup>-1</sup>. Each sample was  
14 assayed in triplicate, including a Milli-Q sample, and the absorbance at a wavelength of 595 nm was  
15 measured by spectrophotometry.

16

## 17 **Proteomics**

18 A targeted proteomics approach was used following established in-house protocols. Samples of  
19 PUREflex2.0 (GeneFrontier, Japan) of 1  $\mu$ L were taken and incubated at 55  $^{\circ}$ C for 20 min in 16.5  $\mu$ L of  
20 50 mM Tris-HCl, pH 7.6, 0.1% 2-octoglycoside, 12.5 mM DTT and 1 mM CaCl<sub>2</sub>. Then, 32.6 mM final  
21 concentration of iodoacetamide was added and the solution was incubated for 30 min in the dark.  
22 Finally, 0.5  $\mu$ g of trypsin was added and the solution was incubated overnight at 37  $^{\circ}$ C. The following  
23 day, 2  $\mu$ L of 10% trifluoroacetic acid was added, the sample was incubated at room temperature for 5  
24 min, the solution was centrifuged at 16,200 r.c.f. for 30 min and the supernatant was transferred to  
25 an HPLC-vial for analysis.

26 Mass spectrometry analysis of tryptic peptides was conducted on a 6460 Triple Quad LC-MS  
27 system (Agilent Technologies, USA). From the samples prepared according to the protocol described  
28 above, 10  $\mu$ L were injected into an ACQUITY UPLC<sup>®</sup> Peptide CSH<sup>™</sup> C18 Column (Waters Corporation,  
29 USA). Peptides were separated in a gradient of buffer C (25 mM formic acid in Milli-Q) and buffer D  
30 (50 mM formic acid in acetonitrile) at a flow rate of 500  $\mu$ L per minute at a column temperature of 40  
31  $^{\circ}$ C. The column was equilibrated with 98:2 ratio of buffer C to D. After injection, over 20 min the ratio  
32 was changed to 75:25 buffer C to D after which, within 30 s, the ratio went to 20:80 buffer C to D and  
33 was held for another 30 s. Finally, the column was flushed for 5 min with 98:2 buffer C to D ratio.

34 **Supplementary Table 3** shows the transition of the MS/MS measurements that were observed in  
35 every experiment. EF-Tu is a constant component of the PURE system and served as a global internal

1 standard for variations due to evaporation or sample handling. Data were represented as the peak  
2 integrated intensity of a given peptide normalized to that of the TTLTAAITTVLAK peptide of EF-Tu. All  
3 proteomics results were analysed in Skyline-daily 4.1.1.18179 (MacCoss lab, University of  
4 Washington, USA).

5 Retention time was predicted after standard runs with the above-described method using the  
6 Pierce™ Peptide Retention Time Calibration Mixture (Catalog number 88320, Thermo Scientific, USA).

7

#### 8 **Precursor films**

9 Palmitoyl-CoA, oleoyl-CoA, and NBD-palmitoyl-CoA were obtained from Avanti Polar lipids (USA) in  
10 powdered form. The powders were dissolved in chloroform:methanol:water (40:10:1 vol. fractions),  
11 aliquoted, dried, and stored under argon. Before use, the acyl-CoA's were resuspended and diluted in  
12 chloroform to a final concentration of 100  $\mu\text{M}$ . Using Gilson Microman pipettes, the acyl-CoA  
13 solution was added to PCR tubes. Organic solvent was evaporated at ambient pressure and  
14 temperature for  $\sim 5$  h, resulting in a dried precursor film. Acyl-CoA volumes were chosen such that  
15 the concentration of precursor after resuspension in the samples was 100  $\mu\text{M}$  (50  $\mu\text{M}$  for NBD  
16 experiments). For NBD experiments, films consisted of 10% NBD-palmitoyl-coA and 90% palmitoyl-  
17 CoA and were limitedly exposed to light.

18

#### 19 **LUV experiments**

20 LUVs were prepared by extrusion of large multilamellar vesicles (LMVs). A 2 mg lipid mixture  
21 consisting of DOPC/DOPE/DOPG/CL/DSPE-PEG-biotin (50 mol%/36 mol%/12 mol%/2 mol%/1 mass%)  
22 dissolved in chloroform was prepared in a 2 mL glass vial, dried under gentle argon flow and  
23 subsequently desiccated for 1 h. The film was then resuspended in 250  $\mu\text{L}$  buffer E (20 mM HEPES,  
24 180 mM potassium glutamate, 14 mM magnesium acetate, pH 7.6) and vortexed to create LMVs.  
25 Four freeze-thaw cycles were applied and samples were extruded with a 400 nm membrane using  
26 the Avanti mini-extruder, according to instructions provided by the manufacturer. LUVs were  
27 aliquoted, snap-frozen in liquid nitrogen and stored at  $-20$  °C.

28 PUREflex2.0 reaction solutions were assembled according to the instruction provided by the  
29 manufacturer, and supplied with 0.75 U  $\mu\text{L}^{-1}$  Superase (Invitrogen), 5 mM  $\beta$ -mercaptoethanol, 500  
30  $\mu\text{M}$   $^{13}\text{C}$ -labelled G3P, 1 mM CTP, 500  $\mu\text{M}$  L-serine, 0.4 mg  $\text{mL}^{-1}$  lipids from the LUV mixture, and 1 nM  
31 of pGEMM7 plasmid, unless stated otherwise. When indicated, 2 U  $\mu\text{L}^{-1}$  SP6 RNAP was  
32 supplemented. The reaction mixture was then added to the dried precursor film and incubated  
33 overnight at 37 °C.

1 For the experiments shown in **Fig. 2** and **Supplementary Fig. 11**, LUVs with lipid compositions  
2 DOPC:DOPE (50:50) and DOPC:DOPG:CL (50:48:2) were prepared as described above, and were  
3 mixed in various ratios. Membrane fusion was promoted by applying four freeze-thaw cycles.

4

#### 5 **In-liposome gene expression assays**

6 Giant vesicles were prepared according to the methods described in [36]. Briefly, 2 mg lipids  
7 consisting of DOPC/DOPE/DOPG/CL/DHPE-Texas Red/DSPE-PEG-biotin (50 mol%/36 mol%/12  
8 mol%/2 mol%/0.5 mass%/1 mass%) were mixed with 25.4  $\mu\text{mol}$  rhamnose in methanol and the  
9 mixture was added to 0.6 g of 212-300  $\mu\text{m}$  glass beads (acid washed). Beads were rotary evaporated  
10 for 2 h at room temperature and 20 mbar, and desiccated overnight to remove residual organic  
11 solvent. The lipid-coated beads were stored under argon at  $-20\text{ }^{\circ}\text{C}$  up to one month.

12 PUREflex2.0 reaction solutions were assembled similarly to LUV experiments. Per 10  $\mu\text{L}$   
13 PUREflex2.0 reaction mixture, 5 mg (10 mg for LactC2-eGFP experiments) of lipid-coated beads were  
14 added. Lipid film swelling was performed for 2 h on ice with gentle tumbling every 30 min. Four  
15 freeze-thaw cycles were applied by dipping the sample in liquid nitrogen and thawing at room  
16 temperature. The supernatant (corresponding to about 50% of the total volume) was transferred to  
17 an Eppendorf tube using a cut pipette tip to avoid liposome breakage. To confine gene expression  
18 reactions to the inside of liposomes, 50  $\mu\text{g } \mu\text{L}^{-1}$  proteinase K was added to the liposome sample,  
19 unless indicated otherwise. For experiments involving LactC2-eGFP, 2  $\mu\text{L}$  of liposome-containing  
20 supernatant were diluted in 5.5  $\mu\text{L}$  of a feeding solution consisting of PUREflex2.0 Solution I and  
21 Milli-Q (3:7), 150 nM of LactC2-eGFP and 0.07 U  $\mu\text{L}^{-1}$  RQ1 DNase (Promega). Liposomes were then  
22 transferred to the tube with deposited dried precursor films. Reactions were incubated overnight at  
23  $37\text{ }^{\circ}\text{C}$ , or, in the case of time-lapse microscopy, liposomes were immediately immobilized for imaging  
24 (see below).

25

#### 26 **Sample preparation for LC-MS and HPLC**

27 A solution consisting of methanol with 5 mM EDTA and 2 mM acetylacetone was prepared fresh for  
28 every experiment. Samples were diluted 10- (for HPLC) or 100-fold (for LC-MS) in the methanol  
29 solution, sonicated for 10 min, and centrifuged for 5 min at 16,000 g. The supernatant containing the  
30 lipid fraction was transferred to Agilent 2 mL glass mass spectrometry vials with a low-volume inset,  
31 flushed with argon and stored at  $-20\text{ }^{\circ}\text{C}$ . Samples were analysed within one week after preparation.

32

#### 33 **Liquid chromatography and mass spectrometry analysis of lipids**

34 Mass spectrometry measurements of phospholipid samples were performed using a 6460 Triple  
35 Quad LC-MS system equipped with a similar ACQUITY UPLC<sup>®</sup> Peptide CSH<sup>™</sup> C18 Column as used in

1 proteomics. However, different columns were used for each application, to prevent cross-  
2 contamination. Separation of lipids was performed using a gradient of mobile phase F (water with  
3 0.05% ammonium hydroxide and 2 mM acetylacetone), and mobile phase G (80% 2-propanol, 20%  
4 acetonitrile, 0.05% ammonium hydroxide and 2 mM acetylacetone) at a flow rate of 300  $\mu\text{L min}^{-1}$  and  
5 a column temperature of 60 °C. To equilibrate the column, a ratio of mobile phase F to mobile phase  
6 G of 70:30 was used. Upon injection, this ratio was gradually changed to 100% mobile phase B over  
7 the course of 8 min and then kept like that for 2 min. Subsequently, over the course of 1 min, the  
8 initial 70:30 ratio of mobile phase F and G was reset, which was then used for the last 4 min of the  
9 run. The built-in autosampler of the LC-MS system was used to inject 1  $\mu\text{L}$  (quantitative analysis) or 5  
10  $\mu\text{L}$  (qualitative analysis of low-abundance compounds) of sample solution.

11 Transitions were established based on previous work [21], as well as scanning measurements  
12 of purified standards. The very regular fragmentation pattern (except for LPA, CDP-DAG, and PC,  
13 fragmentation always occurs at the ester linkage between an acyl chain and the glycerol) could be  
14 used to determine transitions. Synthesized phospholipids were distinguished from phospholipids  
15 present at the start of the reaction as part of the liposome matrix by incorporation of  $^{13}\text{C}$ -G3P,  
16 resulting in a 3 Da mass shift.

17 Mass spectrometry data was analysed using the Agilent Masshunter Quantitative analysis  
18 program, which automatically integrates peaks corresponding to the transitions set in the method.  
19 Integrated peak intensities were exported to MATLAB R2016b (MathWorks) for further analysis. For  
20 each transition in each sample, the average integrated counts of two injections was determined. For  
21 end products, integrated counts were converted to concentrations using linear calibration curves  
22 fitted to signals from a dilution series of standards ran before and after every mass spectrometry  
23 measurement series.

24

## 25 HPLC

26 High-pressure liquid chromatography (HPLC) was used to separate synthesized NBD-labelled lipid  
27 species. An Agilent Technologies 1260 Infinity HPLC system equipped with an HSS T3 2.5  $\mu\text{m}$  column  
28 was used with mobile phase H (60% acetonitrile, 40% water, 0.0114% formic acid, 7 mM ammonium  
29 formate, and 2 mM acetylacetone) and mobile phase I (90% 2-propanol, 10% acetonitrile, 0.0378%  
30 formic acid, and 2 mM acetylacetone), as previously reported in [21]. The flow rate was 500  $\mu\text{L min}^{-1}$   
31 and the column temperature was 35 °C. Upon injection of 5  $\mu\text{L}$  of sample, 100% mobile phase H was  
32 used, over the course of 1.5 min changing to a ratio of mobile phase H to mobile phase I of 35:65,  
33 which was then gradually changed in 8.5 min to 30:70, and then, in 2 min, to 5:95, which was  
34 retained for 1 min. Subsequently, in the final 2 min of the run, the initial gradient was restored. NBD

1 fluorescence was detected with an excitation wavelength of 463 nm and an emission wavelength of  
2 536 nm.

3

#### 4 **Microscopy**

5 Liposomes were immobilized in custom-made glass imaging chambers pre-incubated for 10 min with  
6 BSA-biotin:BSA (1 mg mL<sup>-1</sup>) and then with Neutravidin (1 mg mL<sup>-1</sup>). When appropriate, free NBD-  
7 palmitoyl-CoA was removed by washing the sample three times with an equal volume of buffer E,  
8 followed by 30 min of incubation at 37 °C. Image acquisition was performed using a Nikon A1R Laser  
9 scanning confocal microscope using the following excitation/emission wavelengths: 457/525 nm  
10 (NBD), 488/509 nm (LactC2-eGFP), 514/540 nm (YFP), and 561/595 nm (Texas Red). The sample  
11 height was adjusted manually in order to equatorially dissect as many liposomes as possible.

12

#### 13 **Image analysis**

14 To determine NBD and LactC2-eGFP fluorescence intensity at the membrane, both manual and  
15 automated image analyses have been applied concurrently. For manual image analysis, Fiji [52] was  
16 used to obtain line profiles of Texas Red and NBD/eGFP intensity along cross-sections of liposomes  
17 selected for unilamellarity in the membrane dye channel. To prevent bias, the NBD/eGFP channel  
18 was not viewed during analysis. The two peaks in the NBD/eGFP line profiles were subsequently  
19 detected using a custom MATLAB R2016b script, and the average intensity of these peaks was  
20 calculated. Line profiles with less or more than two peaks were discarded from the analysis.

21 The automated image analysis script was written in MATLAB R2016b and was based on the  
22 image analysis procedure we previously developed [36]. In short, a *floodfill* algorithm was used to  
23 determine liposome lumina, based on the Texas Red membrane signal. To determine the NBD/eGFP  
24 intensity along the membrane, first the centroid and radius were determined for every detected  
25 liposome. Then, intensity profiles along a line from the centroid to 1.5 times the radius, along 63  
26 different angles, were determined. For every line profile, the maximum intensity, corresponding to  
27 the membrane intersection, was recorded, and values were averaged to obtain the NBD/eGFP  
28 intensity of the membrane. Since this approach is quite sensitive to possible deviations from a  
29 spherical shape, a more stringent circularity criterion than previously reported was applied.

30

31



1 **Acknowledgements**

2 We thank Andrew Scott for performing preliminary experiments with NBD-palmitoyl-CoA, Marijn van  
3 den Brink for contributing experiments with LactC2-mCherry, Marek Noga from the Greg Bokinsky  
4 lab (TU Delft) for providing us with acyl-ACP, Jorick van de Grift from the Dorus Gadella lab  
5 (University of Amsterdam) for providing us with the original plasmid containing the *egfp-lactC2* gene,  
6 Niels van den Broek for assistance with LC-MS, Gemma van der Voort for contributing earlier versions  
7 of the pGEMM constructs, Sophie van der Horst for cloning the *meYFP* constructs and performing the  
8 corresponding fluorescence measurements, and Anne Doerr for isolating and cloning the *fadD* gene.  
9 This project was funded by the Netherlands Organization for Scientific Research (NWO/OCW)  
10 through the Gravitation grants ‘NanoFront – Frontiers of Nanoscience’ and ‘BaSyC – Building a  
11 Synthetic Cell’ (024.003.019).

12

13 **Author contributions**

14 CD conceived and supervised the research. DB, DF and ACS performed the experiments. DB, DF and  
15 CD designed the experiments and wrote the paper. All the authors analysed data and discussed the  
16 results.

17

18 **Conflict of interest**

19 The authors declare no conflict of interest.

20

21 **Data availability statement**

22 Data supporting the findings of this manuscript are available from the corresponding author upon  
23 reasonable request. The source data underlying several main text and supplementary figures are  
24 provided as a Source Data file. Proteomics data will be uploaded on Panorama Public ([https://](https://panoramaweb.org/)  
25 [panoramaweb.org/](https://panoramaweb.org/)) upon acceptance of the manuscript.

26

27

## 1 REFERENCES

- 2 [1] Pohorille, A., & Deamer, D. Artificial cells: prospects for biotechnology. *Trends Biotechnol* **20**, 123–128  
3 (2002).
- 4 [2] Luisi, P. L. Toward the engineering of minimal living cells. *Anat. Rec.* **268**, 208–214 (2002)
- 5 [3] Luisi, P. L., Ferri, F., & Stano, P. Approaches to semi-synthetic minimal cells: A review. *Naturwissenschaften*  
6 **93**, 1–13 (2006).
- 7 [4] Varela, F. G., Maturana, H. R., & Uribe, R. Autopoiesis: The organization of living systems, its  
8 characterization and a model. *BioSystems* **5**, 187–196 (1974).
- 9 [5] Gánti, T. Organization of chemical reactions into dividing and metabolizing units: The chemotons.  
10 *BioSystems* **7**, 15–21 (1975).
- 11 [6] Wick, R., Walde, P., & Luisi, P. L. Light microscopic investigations of the autocatalytic self-reproduction of  
12 giant vesicles. *J. Am. Chem. Soc.* **117**, 1435–1436 (1995).
- 13 [7] Hanczyc, M. M., Fujikawa, S. M., & Szostak, J. W. Experimental models of primitive cellular compartments:  
14 encapsulation, growth, and division. *Science* **302**, 618–622 (2003).
- 15 [8] Deshpande, S., Wunnava, S., Hueting, D. & Dekker, C. Membrane tension-mediated growth of liposomes.  
16 *Small* **15**, e1902898 (2019).
- 17 [9] Tsuji, G., Fujii, S., Sunami, T. & Yomo, T. Sustainable proliferation of liposomes compatible with inner RNA  
18 replication. *Proc. Natl. Acad. Sci. U. S. A.* **113**, 590–595 (2016).
- 19 [10] Kurihara, K., et al. Self-reproduction of supramolecular giant vesicles combined with the amplification of  
20 encapsulated DNA. *Nat. Chem.* **3**, 775–781 (2011).
- 21 [11] Hardy, M. D., et al. Self-reproducing catalyst drives repeated phospholipid synthesis and membrane  
22 growth. *Proc. Natl. Acad. Sci. U.S.A.* **112**, 8187–8192 (2015).
- 23 [12] Brea, R. J., Cole, C. M. & Devaraj, N. K. In situ vesicle formation by native chemical ligation. *Angew. Chemie*  
24 *- Int. Ed.* **53**, 14102–14105 (2014).
- 25 [13] Kurihara, K. et al. A recursive vesicle-based model protocell with a primitive model cell cycle. *Nat.*  
26 *Commun.* **6**, 8352 (2015).
- 27 [14] Chen, I. A., Roberts, R. W. & Szostak, J. W. The emergence of competition between model protocells.  
28 *Science* **305**, 1474–1476 (2004).
- 29 [15] Adamala, K. P., Engelhart, A. E. & Szostak, J. W. Collaboration between primitive cell membranes and  
30 soluble catalysts. *Nat. Commun.* **7**, 11041 (2016).
- 31 [16] Deamer, D. W. & Gavino, V. Lysophosphatidylcholine acyltransferase: purification and applications in  
32 membrane studies. *Ann. N. Y. Acad. Sci.* **414**, 90–6 (1983).
- 33 [17] Schmidli, P. K., Schurtenberger, P., & Luisi, P. L. Liposome-mediated enzymatic synthesis of  
34 phosphatidylcholine as an approach to self-replicating liposomes. *J. Am. Chem. Soc.* **113**, 8127–8130 (1991).
- 35 [18] Wick, R. & Luisi, P. L. Enzyme-containing liposomes can endogenously produce membrane-constituting  
36 lipids. *Chem. Biol.* **3**, 277–285 (1996).

- 1 [19] Exterkate, M., Caforio, A., Stuart, M. C. A., & Driessen, A. J. M. Growing membranes in vitro by continuous  
2 phospholipid biosynthesis from free fatty acids. *ACS Synth. Biol.* **7**, 153–165 (2018).
- 3 [20] Kuruma, Y., Stano, P., Ueda, T., & Luisi, P. L. A synthetic biology approach to the construction of membrane  
4 proteins in semi-synthetic minimal cells. *Biochim. Biophys. Acta* **1788**, 567–574 (2009).
- 5 [21] Scott, A., et al. Cell-free phospholipid biosynthesis by gene-encoded enzymes reconstituted in liposomes.  
6 *PLoS One* **11**, e0163058 (2016).
- 7 [22] Shimizu, Y. et al. Cell-free translation reconstituted with purified components. *Nat. Biotechnol.* **19**, 751–  
8 755 (2001).
- 9 [23] Yao, J., & Rock, C. O. Phosphatidic acid synthesis in bacteria. *Biochim. Biophys. Acta* **1831**, 495–502 (2013).
- 10 [24] Sparrow, C. P., & Raetz, C. R. H. Purification and properties of the membrane-bound CDP-diglyceride  
11 synthetase from *Escherichia coli*. *J. Biol. Chem.* **260**, 12084–12091 (1985).
- 12 [25] Hirabayashi, T., Larson, T. J., & Dowhan, W. Membrane-associated phosphatidylglycerophosphate  
13 synthetase from *Escherichia coli*: Purification by substrate affinity chromatography on cytidine 5' diphospho-  
14 1,2-diacyl-sn-glycerol sepharose. *Biochemistry* **15**, 5205–5211 (1976).
- 15 [26] Icho, T., & Raetz, C. R. H. Multiple genes for membrane-bound phosphatases in *Escherichia coli* and their  
16 action on phospholipid precursors. *J. Bacteriol.* **153**, 722–730 (1983).
- 17 [27] Lu, Y.-H. H., Guan, Z., Zhao, J., & Raetz, C. R. Three phosphatidylglycerol-phosphate phosphatases in the  
18 inner membrane of *Escherichia coli*. *J. Biol. Chem.* **286**, 5506–5518 (2011).
- 19 [28] Li, Q. X., & Dowhan, W. Structural characterization of *Escherichia coli* phosphatidylserine decarboxylase. *J.*  
20 *Biol. Chem.* **263**, 11516–22 (1988)
- 21 [29] Gibson, D. G. et al. Enzymatic assembly of DNA molecules up to several hundred kilobases. *Nat. Methods*  
22 **6**, 343–345 (2009).
- 23 [30] Raetz, C. R. H., & Kennedy, E. P. The association of phosphatidylserine synthetase with ribosomes in  
24 extracts of *Escherichia coli*. *J. Biol. Chem* **247**, 2008–2014 (1972).
- 25 [31] Louie, K., & Dowhan, W. Investigations on the association of phosphatidylserine synthase with the  
26 ribosomal component from *Escherichia coli*. *J. Biol. Chem.* **255**, 1124–1127 (1980).
- 27 [32] Saha, S. K., Nishijima, S., Matsuzaki, H., Shibuya, I., & Matsumoto, K. A regulatory mechanism for the  
28 balanced synthesis of membrane phospholipid species in *Escherichia coli*. *Biosci. Biotechnol. Biochem.* **60**, 111–  
29 116 (1996).
- 30 [33] Rilfors, L., et al. Reconstituted phosphatidylserine synthase from *Escherichia coli* is activated by anionic  
31 phospholipids and micelle-forming amphiphiles. *Biochim. Biophys. Acta* **1438**, 281–294 (1999).
- 32 [34] Scheideler, M. A., & Bell, R. M. Phospholipid dependence of homogeneous, reconstituted sn-glycerol-3-  
33 phosphate acetyltransferase of *Escherichia coli*. *J. Biol. Chem.* **264**, 12455–12461 (1989).
- 34 [35] Shibuya, I. Metabolic regulation and biological functions of phospholipids in *Escherichia coli*. *Prog. Lipid*  
35 *Res.* **31**, 245–299 (1992).
- 36 [36] Blanken, D., Van Nies, P., & Danelon, C. Quantitative imaging of gene-expressing liposomes reveals rare  
37 favorable phenotypes. *Phys. Biol.* **16**, 045002 (2019).

- 1 [37] Yeung, T., et al. Membrane phosphatidylserine regulates surface charge and protein localization. *Science*  
2 **319**, 210–213 (2008).
- 3 [38] Aktas, M., & Narberhaus, F. In vitro characterization of the enzyme properties of the phospholipid N-  
4 methyltransferase PmtA from *Agrobacterium tumefaciens*. *J. Bacteriol.* **191**, 2033–2041 (2009).
- 5 [39] Hiraoka, S., Nukui, K., Uetake, N., Ohta, A. & Shibuya, I. Amplification and substantial purification of  
6 cardiolipin synthase of *Escherichia coli*. *J. Biochem.* **110**, 443–449 (1991).
- 7 [40] Nourian, Z., Roelofsen, W. & Danelon, C. Triggered gene expression in fed-vesicle microreactors with a  
8 multifunctional membrane. *Angew. Chemie - Int. Ed.* **51**, 3114–3118 (2012).
- 9 [41] Nourian, Z. & Danelon, C. Linking genotype and phenotype in protein synthesizing liposomes with external  
10 supply of resources. *ACS Synth. Biol.* **2**, 186–193 (2013).
- 11 [42] Saito, H. et al. Time-resolved tracking of a minimum gene expression system reconstituted in giant  
12 liposomes. *ChemBioChem* **10**, 1640–1643 (2009).
- 13 [43] Doerr, A., et al. Modelling cell-free RNA and protein synthesis with minimal systems. *Phys. Biol.* **16**, 25001  
14 (2019).
- 15 [44] Murtas, G. Internal lipid synthesis and vesicle growth as a step toward self-reproduction of the minimal  
16 cell. *Syst. Synth. Biol.* **4**, 85–93 (2010).
- 17 [45] Bhattacharya, A., Brea, R. J., Niederholtmeyer, H., & Devaraj, N. K. A minimal biochemical route towards de  
18 novo formation of synthetic phospholipid membranes. *Nat. Commun.* **10**, 300 (2019).
- 19 [46] Vogeleson, K. et al. Towards synthetic cells using peptide-based reaction compartments. *Nat. Commun.* **9**,  
20 3862 (2018).
- 21 [47] Mercier, R., Kawai, Y., & Errington, J. Excess membrane synthesis drives a primitive mode of cell  
22 proliferation. *Cell* **152**, 997–1007 (2013).
- 23 [48] Sakuma, Y., & Imai, M. Model system of self-reproducing vesicles. *Phys. Rev. Lett.* **107**, 1–5 (2011).
- 24 [49] Fujii, S., Matsuura, T., Sunami, T., Kazuta, Y. & Yomo, T. In vitro evolution of  $\alpha$ -hemolysin using a liposome  
25 display. *Proc. Natl. Acad. Sci. U. S. A.* **110**, 16796–16801 (2013).
- 26 [50] Van Nies, P., et al. Self-replication of DNA by its encoded proteins in liposome-based synthetic cells. *Nat.*  
27 *Commun.* **9**, 1583 (2018).
- 28 [51] Godino, E., et al. De novo synthesized Min proteins drive oscillatory liposome deformation and regulate  
29 FtsA-FtsZ cytoskeletal patterns cytoskeletal patterns. *Nat. Commun.* **10**, 4969 (2019).
- 30 [52] Schindelin, J., et al. Fiji: an open-source platform for biological-image analysis. *Nat. Methods* **9**, 676-682  
31 (2012).

32
